# Supplementary material for: Newborn Health and Child Mortality Across England
Source: PubMed Central journal article supplement (PMC10582783; doi:10.1001/jamanetworkopen.2023.38055), 2023-10-17

## Supplemental Online Content

Odd D, Williams T, Stoianova S, Roussouw G, Fleming P, Luyt K. Newborn health and child mortality across England. *JAMA Netw Open*. 2023;6(10):e2338055. doi:10.1001/jamanetworkopen.2023.38055

**eTable 1.** Text Used for Identification of Neonatal Conditions

**eTable 2.** Text Used for Identification of Additional Neonatal Conditions

**eTable 3.** *ICD-10* Codes for Specific Chronic Conditions

**eTable 4.** Name and Description for Each Category of Death on the Child Death Review Analysis Form in Hierarchical Order

**eFigure.** Data Flow for the Different Analyses

This supplemental material has been provided by the authors to give readers additional information about their work.

**eTable 1. Text Used for Identification of Neonatal Conditions**

| <b>Preterm Birth</b> | <b>Hypoxic Ischaemic Encephalopathy (HIE)</b> | <b>Congenital Abnormalities</b>    |
|----------------------|-----------------------------------------------|------------------------------------|
| preterm              | moderate neonatal encephalopathy              | congenital                         |
| prematurity          | severe neonatal encephalopathy                | transposition great arteries (tga) |
|                      | hypoxic ischaemic encephalopathy (HIE)        | renal agenesis                     |
|                      | hypoxic-ischaemic encephalopathy              | hypoplastic right heart syndrome   |
|                      | hypoxic ischemic encephalopathy               | hypoplastic left heart syndrome    |
|                      | hypoxic-ischemic encephalopathy               | diaphragmatic hernia (cdh)         |
|                      | hypoxic-ischemia encephalopathy               | trisomy                            |
|                      | hypoxic brain injury                          | triploidy                          |
|                      | hypoxic ischaemic brain damage                | exomphalos                         |
|                      |                                               | gastroschisis                      |
|                      |                                               | tetralogy                          |
|                      |                                               | mutation                           |
|                      |                                               | chromosomal                        |
|                      |                                               | translocation                      |
|                      |                                               | down's syndrome                    |
|                      |                                               | patau's syndrome                   |
|                      |                                               | edward's syndrome                  |
|                      |                                               | atresia                            |
|                      |                                               | spina bifida                       |
|                      |                                               | neural tube defect                 |

**eTable 2. Text Used for Identification of Additional Neonatal Conditions**

| <b>Necrotising Enterocolitis (NEC)</b> | <b>Multiple Birth</b> | <b>Intracranial Haemorrhage</b>                 | <b>Perinatal Lung Disease</b> |
|----------------------------------------|-----------------------|-------------------------------------------------|-------------------------------|
| necrotising enterocolitis              | twin                  | subdural haemorrhage                            | Bronchopulmonary              |
| necrotizing enterocolitis              | triplet               | cerebral haemorrhage                            | BPD                           |
| nec                                    | multiple birth        | intraventricular haemorrhage (ivh)              | Respiratory Distress          |
|                                        | multiple pregnancy    | subarachnoid haemorrhage                        | RDS                           |
|                                        |                       | tentorial tear due to birth injury              | Chronic Lung Disease          |
|                                        |                       | intracranial haemorrhage                        |                               |
|                                        |                       | intracerebral haemorrhage                       |                               |
|                                        |                       | post-haemorrhagic hydrocephalus                 |                               |
|                                        |                       | post-haemorrhagic ventricular dilatation (PHVD) |                               |

**eTable 3. ICD-10 Codes for Specific Chronic Conditions**

| Condition or Group                                                   | ICD-10 codes                                                                                                                                                                                                                                                                                                                                                                                                                                                                                                                                                                                                                                                                                                                                                                                                                                                                                                                    |
|----------------------------------------------------------------------|---------------------------------------------------------------------------------------------------------------------------------------------------------------------------------------------------------------------------------------------------------------------------------------------------------------------------------------------------------------------------------------------------------------------------------------------------------------------------------------------------------------------------------------------------------------------------------------------------------------------------------------------------------------------------------------------------------------------------------------------------------------------------------------------------------------------------------------------------------------------------------------------------------------------------------|
| Behavioural or developmental disorders                               | F70-F79, F80.0-F80.2, F80.8, F80.9, F81-F84, F88, F89, F90-F98                                                                                                                                                                                                                                                                                                                                                                                                                                                                                                                                                                                                                                                                                                                                                                                                                                                                  |
| Chronic Neurological Disease                                         |                                                                                                                                                                                                                                                                                                                                                                                                                                                                                                                                                                                                                                                                                                                                                                                                                                                                                                                                 |
| Cerebral Palsy                                                       | G80-G83                                                                                                                                                                                                                                                                                                                                                                                                                                                                                                                                                                                                                                                                                                                                                                                                                                                                                                                         |
| Epilepsy                                                             | F80.3, G40.0-G40.4, G40.6-G40.9, G41, R56.8, Y46.0-Y46.6                                                                                                                                                                                                                                                                                                                                                                                                                                                                                                                                                                                                                                                                                                                                                                                                                                                                        |
| Neurological Congenital Anomalies                                    | Q00-Q07, Q10.4, Q10.7, Q11-Q12, Q13.0-Q13.4, Q13.8, Q13.9, Q14-Q16, Q75.0, Q75.1, Q85, Q86.0, Q86.1, Q86.8, Q90-Q93, Q95.2, Q95.3, Q97, Q99                                                                                                                                                                                                                                                                                                                                                                                                                                                                                                                                                                                                                                                                                                                                                                                     |
| Other neurological disease                                           | S05*-S08*, S12*, S14*, S24*, S34*, S44*, S54*, S64*, S74*, S84*, S94*, T06.0*-T06.2*, T26*, T90.4*, T90.5*, T91.1*, T91.3*, T92.4* H05.1-H05.9, H13.3, H17, H18, H19.3, H19.8, H21, H26, H27, H28.0-H28.2, H31, H32.8, H33, H34, H35, H40, H42.0, H43, H44, H47, H54.0- H54.2, H54.4, T85.2, T85.3, Z44.2 H60.2, H65.2-H65.4, H66.1-H66.3, H69.0, H70.1, H73.1, H74.0-H74.3, H75.0, H80, H81.0, H81.4, H83.0, H83.2, H90.0, H90.3, H90.5, H90.6, H91, Z45.3, P10, P21.0, P52, P57, P90, P91.1, P91.2, P91.6, F02.2, F02.3, G00-G09, G10-G12, G13.8, G14, G20-G23, G24.1-G24.9, G25-G30, G31.0-G31.1, G31.8, G31.9, G32-G37, G43-G46, G47.0-G47.2, G47.4-G47.9, G50-G52, G53.0, G53.1, G53.8, G54, G55.8, G56-G58, G59.8, G60, G61, G62.0, G62.2-G62.9, G64, G70, G71, G72.2-G72.9, G73.0, G73.3, G90-G93, G94.2, G94.8, G95, G96, G98, G99.1, G99.2, I60-I67, I68.0, I68.2, I69, I72.0, I72.5, T85.0, T85.1, Y46.7-Y46.8, Z98.2 |
| Respiratory Disease                                                  |                                                                                                                                                                                                                                                                                                                                                                                                                                                                                                                                                                                                                                                                                                                                                                                                                                                                                                                                 |
| Asthma and chronic lower respiratory disease                         | J41-J47                                                                                                                                                                                                                                                                                                                                                                                                                                                                                                                                                                                                                                                                                                                                                                                                                                                                                                                         |
| Bronchopulmonary Dysplasia and other perinatal acquired lung disease | P27.1, P27.8, P27.9                                                                                                                                                                                                                                                                                                                                                                                                                                                                                                                                                                                                                                                                                                                                                                                                                                                                                                             |
| Other Respiratory                                                    | E84, P75, S17*, S27*, S28*, T27*, T91.4*, G47.3, J60-J70, J80-J86, J96.1, J98, 27, Y55.6, Z43.0, Z93.0, Z94.2                                                                                                                                                                                                                                                                                                                                                                                                                                                                                                                                                                                                                                                                                                                                                                                                                   |

**eTable 4. Name and Description for Each Category of Death on the Child Death Review Analysis Form in Hierarchical Order**

| Category | Name of category                                                                 | Description of category                                                                                                                                                                                                                                                                                                                                                                     |
|----------|----------------------------------------------------------------------------------|---------------------------------------------------------------------------------------------------------------------------------------------------------------------------------------------------------------------------------------------------------------------------------------------------------------------------------------------------------------------------------------------|
| 1        | Deliberately inflicted injury, abuse or neglect                                  | This includes suffocation, shaking injury, knifing, shooting, poisoning & other means of probable or definite homicide; also deaths from war, terrorism or other mass violence; includes severe neglect leading to death.                                                                                                                                                                   |
| 2        | Suicide or deliberate self-inflicted harm                                        | This includes hanging, shooting, self-poisoning with paracetamol, death by self-asphyxia, from solvent inhalation, alcohol or drug abuse, or other form of self-harm. It will usually apply to adolescents rather than younger children.                                                                                                                                                    |
| 3        | Trauma or other external factors, including medical/surgical complications/error | This includes isolated head injury, other or multiple trauma, burn injury, drowning, unintentional self-poisoning in pre-school children, anaphylaxis & other extrinsic factors. Also includes proven medical and surgical complications or errors as the primary cause of death. Excludes Deliberately inflicted injury, abuse or neglect. (category 1).                                   |
| 4        | Malignancy                                                                       | Solid tumours, leukaemias & lymphomas, and malignant proliferative conditions such as histiocytosis, even if the final event leading to death was infection, haemorrhage etc.                                                                                                                                                                                                               |
| 5        | Acute medical or surgical condition                                              | For example, Kawasaki disease, acute nephritis, intestinal volvulus, diabetic ketoacidosis, acute asthma, intussusception, appendicitis; sudden unexpected deaths with epilepsy.                                                                                                                                                                                                            |
| 6        | Chronic medical condition                                                        | For example, Crohn's disease, liver disease, immune deficiencies, even if the final event leading to death was infection, haemorrhage etc. Includes cerebral palsy with clear post-perinatal cause.                                                                                                                                                                                         |
| 7        | Chromosomal, genetic and congenital anomalies                                    | Trisomies, other chromosomal disorders, single gene defects, neurodegenerative disease, cystic fibrosis, and other congenital anomalies including cardiac.                                                                                                                                                                                                                                  |
| 8        | Perinatal/neonatal event                                                         | Death ultimately related to perinatal events, e.g., sequelae of prematurity, antepartum and intrapartum anoxia, bronchopulmonary dysplasia, necrotising enterocolitis, post-haemorrhagic hydrocephalus, irrespective of age at death. It includes cerebral palsy without evidence of cause, and includes congenital or early-onset bacterial infection (onset in the first postnatal week). |
| 9        | Infection                                                                        | Any primary infection (i.e., not a complication of one of the above categories), arising after the first postnatal week, or after discharge of a preterm baby. This would include septicaemia, pneumonia, meningitis, HIV infection etc.                                                                                                                                                    |
| 10       | Sudden unexpected, unexplained death                                             | Where the pathological diagnosis is either 'SIDS' or 'unascertained', at any age. Excludes Sudden Unexpected Death in Epilepsy (category 5).                                                                                                                                                                                                                                                |

**eFigure. Data Flow for the Different Analyses**

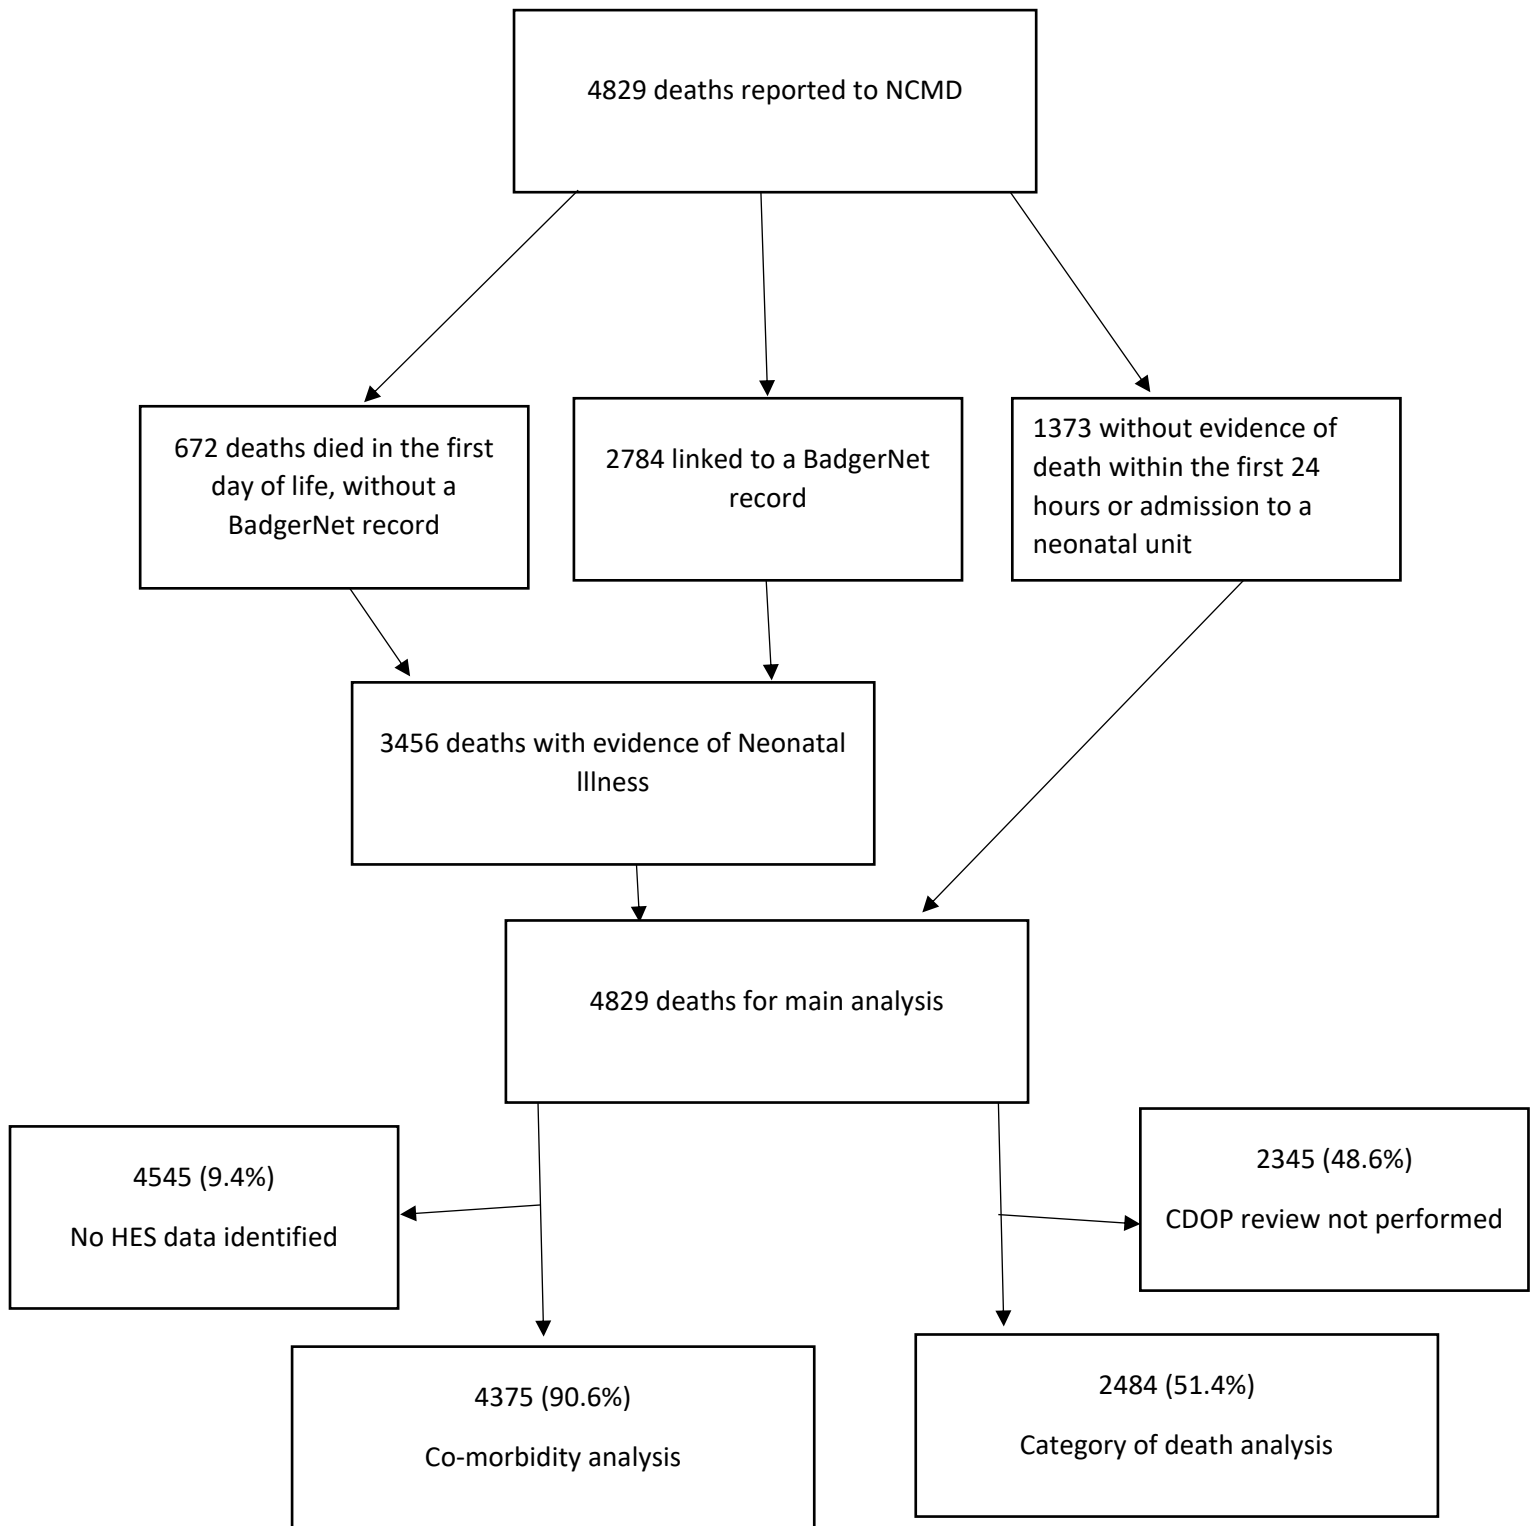

Supplement: jamanetwopen-e2338055-s001.pdf [file jamanetwopen-e2338055-s001.pdf]
