# Supplementary material for: Newborn Health and Child Mortality Across England
Source: PubMed Central journal article supplement (PMC10582783; doi:10.1001/jamanetworkopen.2023.38055), 2023-10-17
Supplement: jamanetwopen-e2338055-s002.pdf [file jamanetwopen-e2338055-s002.pdf]

## Data Sharing Statement

Odd. Newborn Health and Child Mortality Across England. *JAMA Netw Open*. Published October 17, 2023. doi:10.1001/jamanetworkopen.2023.38055

### Data

**Data available:** No
